# Supplementary material for: Experiences of Judeo-Christian Students in Undergraduate Biology
Source: Atypon-hosted journal article supplement (doi:10.1187/cbe.16-04-0153), 2017-02-24
Supplement: combinedsupmats.pdf [file combinedsupmats.pdf]

# Supplemental Material

*CBE—Life Sciences Education*

Barnes *et al.*

Gender:

- Female
- Male
- Decline to answer

Year in degree program:

- Freshmen
- Sophomore
- Junior
- Senior
- Post Bachelor's
- Master's student
- PhD student

How many years have you been attending ASU?

---

Major:

- Biology and Society
- Biomedical Sciences
- Conservation Biology and Ecology
- Genetics, Cell and Developmental Biology
- Neurobiology, Physiology and Behavior
- Biology, General
- Other: \_\_\_\_\_

Please check all the biology classes you have taken (including courses from this semester):

- BIO 181- General Biology I
- BIO 182- General Biology II
- BIO 281-Conceptual Approaches to Biology for Majors I
- BIO 282- Conceptual Approaches to Biology for Majors II
- BIO 340- General Genetics
- BIO 345- Organic Evolution

What is the highest degree you intend to complete?

---

What is your intended career once you have completed your highest degree?

---

Please check the sentence that most closely aligns with what you personally believe:

- God created human beings, more or less, in their present form.
- Human beings have evolved from ancestral species and God actively guided this process.
- Human beings have evolved from ancestral species and God started this process, but did not intervene after.
- Human beings have evolved from ancestral species and I do not know whether God had anything to do with this process.
- Human beings have evolved from ancestral species and God was not involved in this process.

Please check the sentence that is most accurate from a scientific standpoint:

- God created human beings, more or less, in their present form.
- Human beings have evolved from ancestral species and God actively guided this process.
- Human beings have evolved from ancestral species and God started this process, but did not intervene after.
- Human beings have evolved from ancestral species and I do not know whether God had anything to do with this process.
- Human beings have evolved from ancestral species and God was not involved in this process.

How important are your religious beliefs to you?

- Very Unimportant
- Somewhat Unimportant
- Neither Important nor Unimportant
- Somewhat Important
- Very Important

How often do you attend church services?

- Never
- Less than Once a Month
- Once a Month
- 2-3 Times a Month
- Once a Week
- 2-3 Times a Week
- Daily
